# Supplementary material
Source: PubMed Central journal article supplement (PMC6008219)
Supplement: NIHMS960457-supplement-Supplementary_Information.pdf [file NIHMS960457-supplement-Supplementary_Information.pdf]

# Supporting Information

## NIR-Induced Spatiotemporally Controlled Gene Silencing by Upconversion

### Nanoparticle-Based siRNA Nanocarrier

Guojun Chen<sup>1, 2, #</sup>, Ben Ma<sup>2, 3, #</sup>, Ruosen Xie<sup>1, 2</sup>, Yuyuan Wang<sup>1, 2</sup>, Kefeng Dou<sup>3, \*\*</sup>,  
and Shaoqin Gong<sup>1, 2, 4, \*</sup>

**Figure S1:**

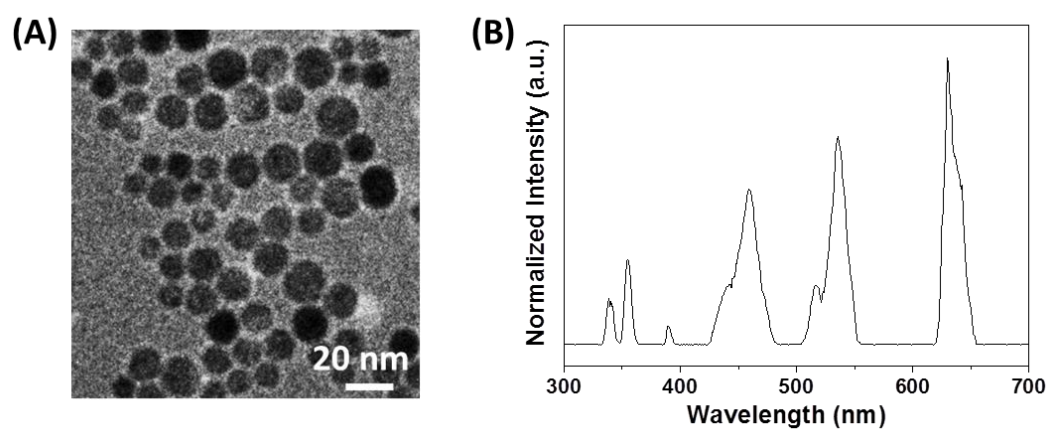

**Figure S1:** (A) TEM image of the CD-UCNPs. (B) Upconversion emission spectrum of the CD-UCNPs.

**Figure S2:**

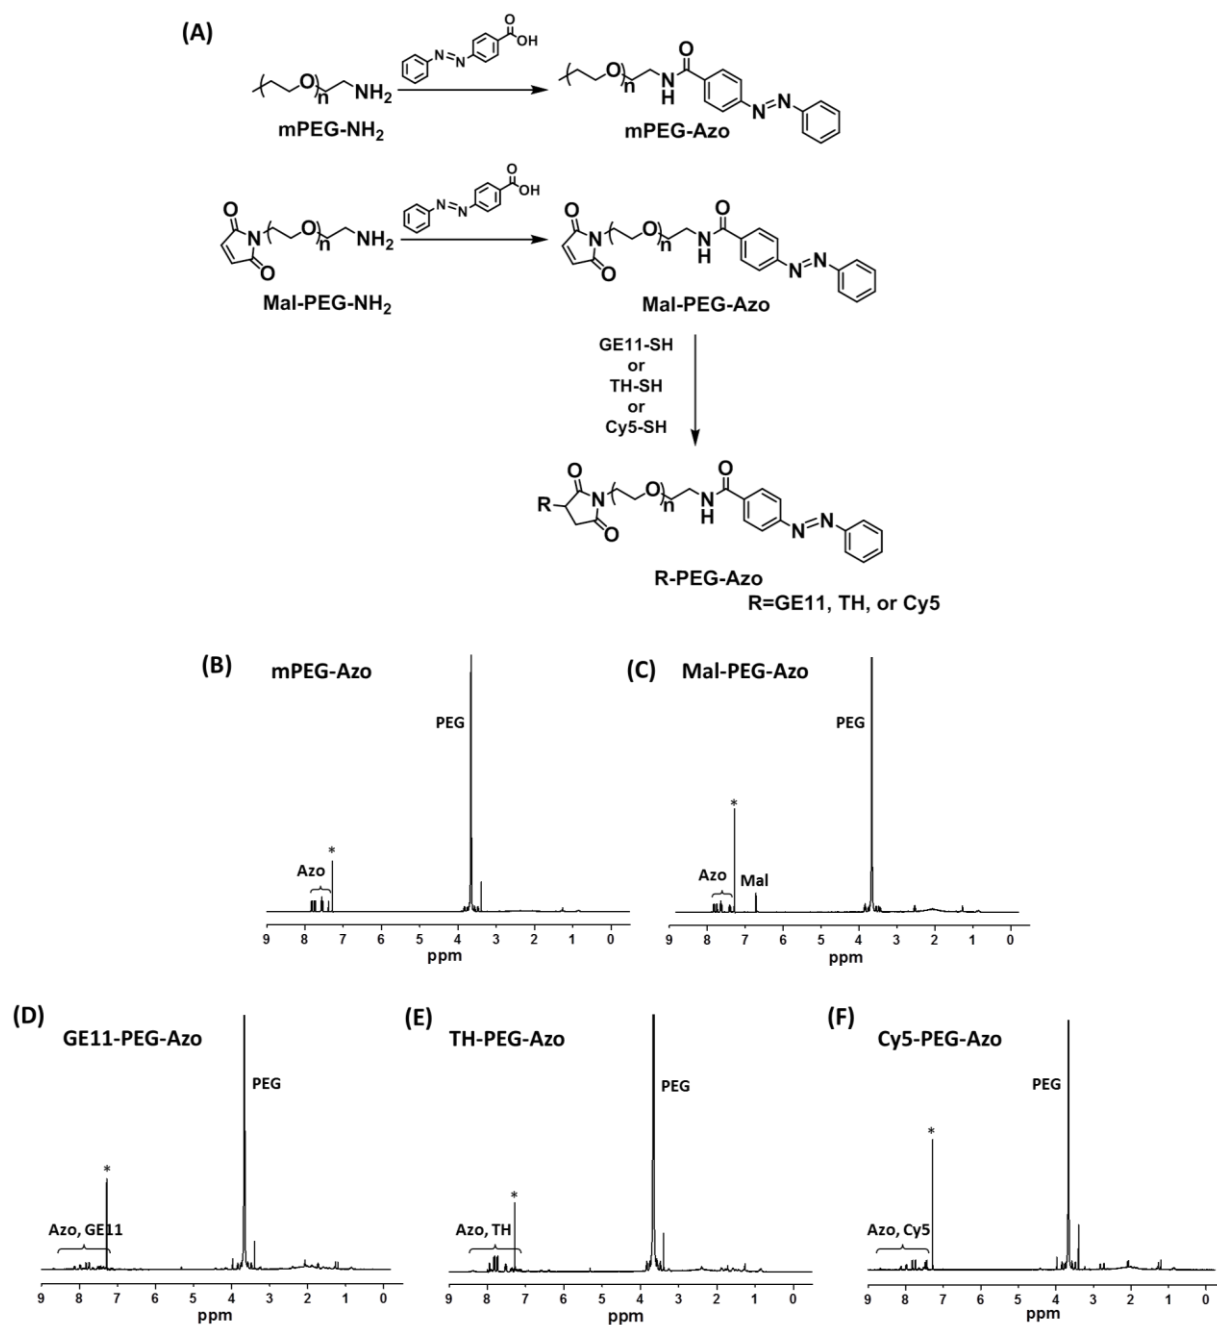

**Figure S2:** (A) A synthetic scheme of Azo-PEGs. <sup>1</sup>H NMR spectra of (A) mPEG-Azo, (B) Mal-PEG-Azo, (C) GE11-PEG-Azo, and (D) Cy5-PEG-Azo.

**Figure S3:**

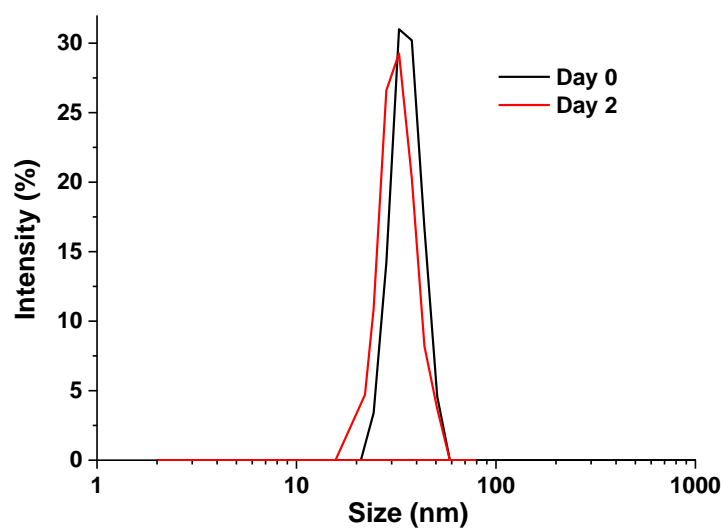

**Figure S3:** Stability test of the UCNP-(CD/Azo)-siRNA/PEG NPs in the cell culture media by DLS analyses.

**Figure S4:**

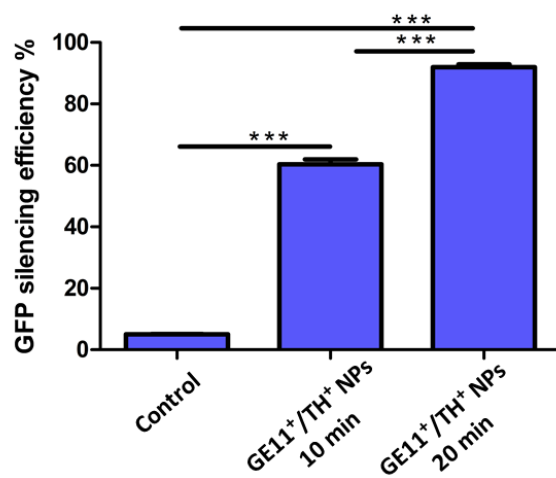

**Figure S4:** *In vitro* gene silencing efficiency assessment with different NIR laser irradiation time. Cells were first treated with UCNP-(CD/Azo)-siRNA/PEG NPs at pH 6.7 for 4 h, followed by NIR irradiation for 10 min or 20 min. \*\*\*:  $p < 0.001$ .

**Figure S5:**

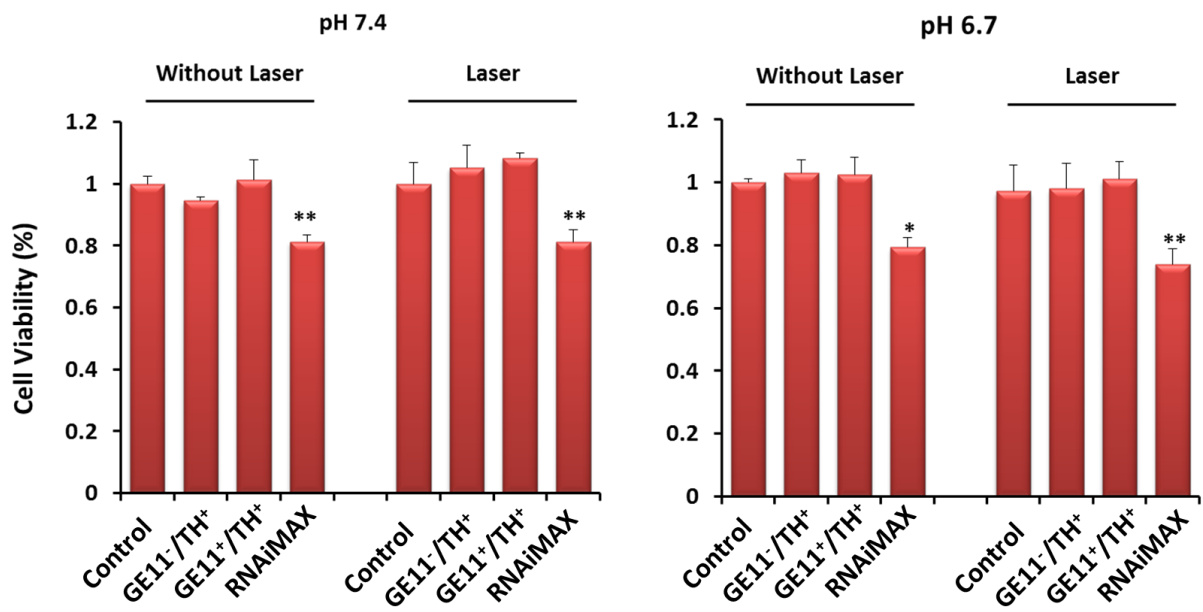

**Figure S5:** Cell viability tests using an MTT assay in a 2D monolayer cell model. Data are presented as the mean  $\pm$  standard deviation ( $n = 5$ ). \*:  $p < 0.05$ ; \*\*:  $p < 0.01$ ; \*\*\*:  $p < 0.001$ .

**Figure S6:**

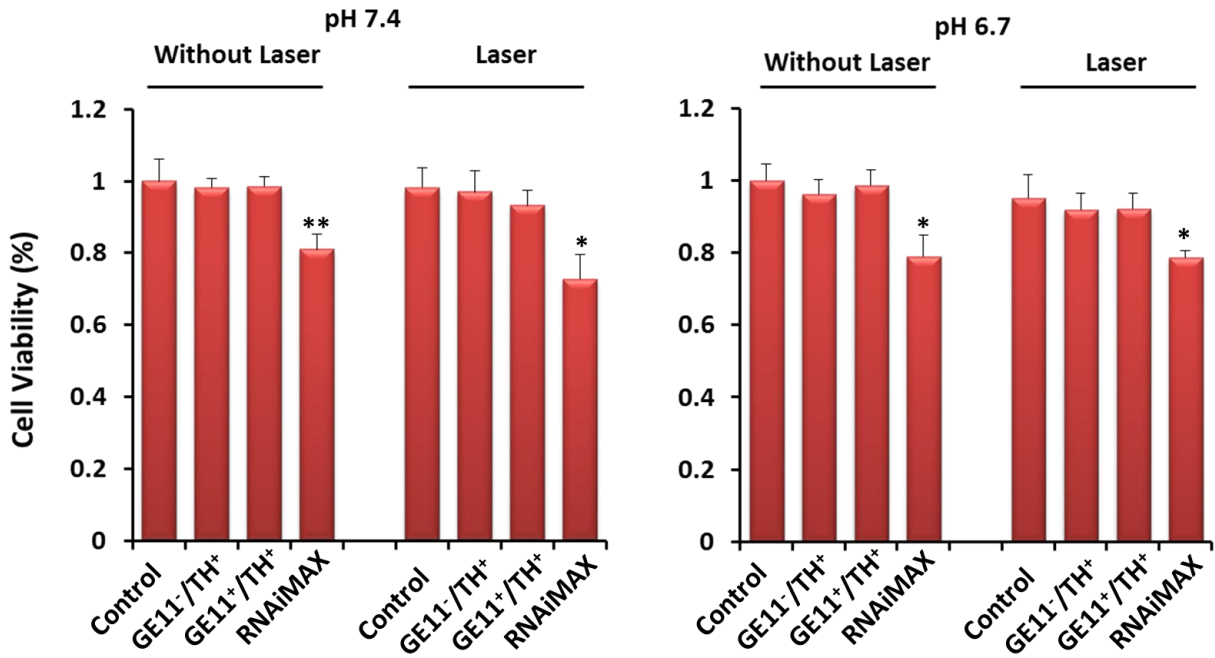

**Figure S6:** Cell viability tests using an MTT assay in a 3D MCTS model. Data are presented as the mean  $\pm$  standard deviation ( $n = 5$ ). \*:  $p < 0.05$ ; \*\*:  $p < 0.01$ ; \*\*\*:  $p < 0.001$ .
